# Supplementary material
Source: publisher figshare collection journal article supplement (https://gsajournals.figshare.com/ndownloader/files/12285143)
Supplement: Supplementary file 1 [file 12285143]

**Table S2. Engineered *S. cerevisiae* strains and their genotypes used in this study.**

| **Genotype** | **Strain name** | **Reference** |
| --- | --- | --- |
| *MATa his3Δ1 leu2Δ0 met15Δ0 ura3Δ0* | BY4741 | ([[1]](#footnote-1)) |
| *MATa/MATα* | 378604X | ([[2]](#footnote-2)) |
| BY4741 *rrp8Δ::KanMX4* | 4018 | ([[3]](#footnote-3)) |
| BY4741 *tvp23Δ::KanMX4* | 4019 | (3) |
| BY4741 *afr1Δ::KanMX4* | 4020 | (3) |
| BY4741 *vct1Δ::KanMX4* | 4024 | (3) |
| BY4741 *ydr090cΔ::KanMX4* | 4025 | (3) |
| BY4741 sge1*Δ::LoxP* | GLBRCY430 | This study |
| BY4741 *ilt1Δ::KanMX* | GLBRCY386 | This study |
| 378604X *sge1Δ::LoxP/sge1Δ::LoxP* | GLBRCYY490 | This study |
| 378604X *ilt1Δ::BleMX/ilt1Δ::KanMX4* | GLBRCY412 | This study |
| BY4741 *SGE1PLL* | GLBRCY627 | This study |
| BY4741 *SGE1SLL* | GLBRCY638 | This study |
| BY4741 *SGE1PLS* | GLBRCY640 | This study |
| BY4741 *SGE1SLS-13Myc-KanMX6* | GLBRCY665 | This study |
| BY4741 *SGE1PLL-13Myc-KanMX6* | GLBRCY465 | This study |
| BY4741 *SGE1SLL-13Myc-KanMX6* | GLBRCY636 | This study |
| BY4741 *SGE1PLS-13Myc-KanMX6* | GLBRCY656 | This study |
| BY4741 *SGE1-GFP(S65T)-KanMX* | GLBRCY751 | This study |
| BY4741 *SGE1PLL-GFP(S65T)-KanMX* | GLBRCY753 | This study |
| BY4741 *ILT1-GFP(S65T)-KanMX* | GLBRCY749 | This study |
| BY4741 *SGE1PLL ilt1Δ::LoxP-hphMX* | GLBRCY716 | This study |
| 378604X *sge1SLS/sge1SLS* | GLBRCY619 | This study |

1. Brachmann CB *et al.* 1998 Designer deletion strains derived from *Saccharomyces cerevisiae* S288C: a useful set of strains and plasmids for PCR-mediated gene disruption and other applications. *Yeast* **14**: 115-1132. [↑](#footnote-ref-1)
2. Liti G *et al.* 2009 Population genomics of domestic and wild yeasts. *Nature* **458**: 337-341. [↑](#footnote-ref-2)
3. Winzeler EA *et al.* 1999 Functional characterization of the *S. cerevisiae* genome by gene deletion and parallel analysis. *Science* **285**: 901-906. [↑](#footnote-ref-3)
